# Supplementary material for: Stress-induced activation of brown adipose tissue prevents obesity in conditions of low adaptive thermogenesis
Source: PubMed Central journal article supplement — Mol Metab. 2015 Nov 11;5(1):19–33. doi: 10.1016/j.molmet.2015.10.005 (PMC4703853; doi:10.1016/j.molmet.2015.10.005), 2015-11-11
Supplement: mmc8.pdf [file mmc8.pdf]

Supplementary Table 1 - Plasma hormones (ng/mL) in wt and  $\beta$ -less mice housed at 22°C

|                | WT control | WT stress | $\beta$ -less control | $\beta$ -less stress | WT control | WT stress | $\beta$ -less control | $\beta$ -less stress |                            |
|----------------|------------|-----------|-----------------------|----------------------|------------|-----------|-----------------------|----------------------|----------------------------|
|                | Average    |           |                       |                      | S.E.M.     |           |                       |                      | Statistical analysis       |
| Corticosterone | 59.8       | 90.8      | 124.1                 | 136.5                | 12.2       | 16.3      | 28.3                  | 30.2                 | Wt vs $\beta$ -less p=0.05 |
| ACTH           | 0.02       | 0.01      | 0.01                  | 0.01                 | 0.002      | 0.003     | 0.001                 | 0.001                | NS                         |
| Leptin         | 2.2        | 6.3       | 5.4                   | 4.4                  | 1.3        | 1.3       | 1.4                   | 1.3                  | Wt Str vs Wt Con p<0.05    |
| Amylin         | 0.09       | 0.17      | 0.08                  | 0.08                 | 0.01       | 0.04      | 0.01                  | 0.01                 | Wt Str vs Wt Con p<0.01    |
| Resistin       | 2.1        | 3.4       | 4.1                   | 3.8                  | 0.7        | 1.4       | 0.8                   | 1.6                  | NS                         |
| Glucagon       | 0.09       | 0.10      | 0.08                  | 0.08                 | 0.015      | 0.018     | 0.005                 | 0.007                | NS                         |
| TNF-alpha      | 0.04       | 0.04      | 0.03                  | 0.03                 | 0.009      | 0.008     | 0.004                 | 0.002                | NS                         |
| GIP            | 0.12       | 0.20      | 0.06                  | 0.07                 | 0.059      | 0.074     | 0.036                 | 0.035                | NS                         |
| PP             | 0.05       | 0.04      | 0.03                  | 0.03                 | 0.007      | 0.008     | 0.001                 | 0.004                | NS                         |
| PYY            | 0.10       | 0.11      | 0.05                  | 0.05                 | 0.020      | 0.019     | 0.005                 | 0.005                | NS                         |
| GLP-1          | 0.21       | 0.22      | 0.22                  | 0.21                 | 0.009      | 0.017     | 0.021                 | 0.015                | NS                         |
| LH             | 0.15       | 1.72      | 0.21                  | 0.45                 | 0.04       | 0.84      | 0.04                  | 0.18                 | NS                         |
| FSH            | 86.6       | 173.4     | 81.7                  | 78.3                 | 13.5       | 45.4      | 12.9                  | 10.9                 | NS                         |
| GH             | 0.8        | 3.2       | 1.7                   | 3.1                  | 0.7        | 1.3       | 0.6                   | 1.0                  | NS                         |
| BDNF           | 0.17       | 0.13      | 0.20                  | 0.24                 | 0.05       | 0.03      | 0.09                  | 0.07                 | NS                         |
