# Supplementary material for: Stress-induced activation of brown adipose tissue prevents obesity in conditions of low adaptive thermogenesis
Source: PubMed Central journal article supplement — Mol Metab. 2015 Nov 11;5(1):19–33. doi: 10.1016/j.molmet.2015.10.005 (PMC4703853; doi:10.1016/j.molmet.2015.10.005), 2015-11-11
Supplement: mmc9.pdf [file mmc9.pdf]

**Supplementary Table 2. Gene Ontology Pathways.**

| Group                       | GO Biological Processes Up-regulated                                  | Odds-ratio | GO Biological Processes Down-regulated                              | Odds-ratio |
|-----------------------------|-----------------------------------------------------------------------|------------|---------------------------------------------------------------------|------------|
| WT Stress vs. WT Control    | translational elongation                                              | 5.19       | very-low-density lipoprotein particle clearance                     | -5.16      |
|                             | musculoskeletal movement                                              | 4.92       | negative regulation of macrophage derived foam cell differentiation | -4.89      |
|                             | microspike assembly                                                   | 4.44       | oxygen transport                                                    | -4.37      |
|                             | muscle contraction                                                    | 4.19       | cholesterol efflux                                                  | -4.34      |
|                             | forward locomotion                                                    | 4.09       | low-density lipoprotein receptor particle metabolic process         | -3.83      |
|                             | cardiac muscle tissue development                                     | 4.00       | gas transport                                                       | -3.67      |
|                             | fructose 1,6-bisphosphate metabolic process                           | 3.62       | cellular ketone body metabolic process                              | -3.55      |
|                             | response to activity                                                  | 3.56       | biphenyl metabolic process                                          | -3.14      |
|                             | directional locomotion                                                | 3.50       | negative regulation of autophagy                                    | -2.92      |
|                             | fructose 6-phosphate metabolic process                                | 3.28       | peroxisome organization                                             | -2.52      |
|                             | collagen biosynthetic process                                         | 3.06       | brown fat cell differentiation                                      | -2.49      |
|                             | uropod organization                                                   | 3.01       | platelet-derived growth factor receptor signaling pathway           | -2.08      |
|                             | response to lead ion                                                  | 2.77       | lipoprotein metabolic process                                       | -1.95      |
|                             | calcium ion homeostasis                                               | 2.67       | water transport                                                     | -1.94      |
|                             | blood vessel remodeling                                               | 2.55       | acyl-CoA metabolic process                                          | -1.91      |
|                             | bioluminescence                                                       | 2.54       | regulation of mRNA stability                                        | -1.86      |
|                             | negative regulation of smooth muscle cell proliferation               | 2.48       | cell division                                                       | -1.84      |
|                             | neuromuscular synaptic transmission                                   | 2.33       | negative regulation of proteolysis                                  | -1.80      |
|                             | aldehyde catabolic process                                            | 2.32       | xenobiotic metabolic process                                        | -1.75      |
|                             | pattern specification process                                         | 2.29       | fat cell differentiation                                            | -1.67      |
|                             | ovulation from ovarian follicle                                       | 2.17       | fatty acid metabolic process                                        | -1.53      |
|                             | nucleosome assembly                                                   | 2.06       | glycerol ether metabolic process                                    | -1.50      |
|                             | respiratory burst                                                     | 2.03       | electron transport chain                                            | -1.27      |
|                             | response to heat                                                      | 1.90       | negative regulation of catalytic activity                           | -1.12      |
|                             | muscle organ development                                              | 1.81       | response to hormone stimulus                                        | -1.10      |
|                             | activation of plasma proteins involved in acute inflammatory response | 1.81       | peptide metabolic process                                           | -1.07      |
|                             | extracellular matrix organization                                     | 1.49       | cellular aromatic compound metabolic process                        | -1.02      |
|                             | cell-substrate adhesion                                               | 1.39       | generation of precursor metabolites and energy                      | -0.96      |
|                             | cellular carbohydrate metabolic process                               | 1.22       | nucleoside monophosphate biosynthetic process                       | -0.95      |
|                             | DNA-dependent transcription, initiation                               | 1.17       | response to nutrient levels                                         | -0.94      |
|                             | regulation of cell growth                                             | 1.15       | one-carbon metabolic process                                        | -0.80      |
|                             | carbohydrate metabolic process                                        | 1.09       | heterocycle metabolic process                                       | -0.74      |
|                             | calcium ion transport                                                 | 1.05       | mRNA metabolic process                                              | -0.71      |
|                             | cellular aldehyde metabolic process                                   | 1.00       | RNA processing                                                      | -0.57      |
|                             | protein maturation                                                    | 0.99       | translation                                                         | -0.53      |
|                             | respiratory system development                                        | 0.98       |                                                                     |            |
|                             | pigment biosynthetic process                                          | 0.89       |                                                                     |            |
|                             | cytokinesis                                                           | 0.88       |                                                                     |            |
|                             | tissue remodeling                                                     | 0.87       |                                                                     |            |
|                             | actin filament-based process                                          | 0.84       |                                                                     |            |
| osteoblast differentiation  | 0.74                                                                  |            |                                                                     |            |
| gliogenesis                 | 0.70                                                                  |            |                                                                     |            |
| cellular component movement | 0.66                                                                  |            |                                                                     |            |
| aging                       | 0.64                                                                  |            |                                                                     |            |
| protein folding             | 0.64                                                                  |            |                                                                     |            |

|                                                          |      |                                                      |       |
|----------------------------------------------------------|------|------------------------------------------------------|-------|
| protein dephosphorylation                                | 0.63 |                                                      |       |
| nucleocytoplasmic transport                              | 0.63 |                                                      |       |
| anatomical structure formation involved in morphogenesis | 0.60 |                                                      |       |
| dephosphorylation                                        | 0.58 |                                                      |       |
| response to abiotic stimulus                             | 0.51 |                                                      |       |
| ossification                                             | 0.49 |                                                      |       |
| developmental maturation                                 | 0.49 |                                                      |       |
| negative regulation of apoptotic process                 | 0.47 |                                                      |       |
| bone development                                         | 0.47 |                                                      |       |
| skeletal system development                              | 0.46 |                                                      |       |
| locomotory behavior                                      | 0.44 |                                                      |       |
| tube development                                         | 0.44 |                                                      |       |
| cellular membrane organization                           | 0.42 |                                                      |       |
| small GTPase mediated signal transduction                | 0.38 |                                                      |       |
| cell activation                                          | 0.38 |                                                      |       |
| enzyme linked receptor protein signaling pathway         | 0.37 |                                                      |       |
| microtubule-based process                                | 0.35 |                                                      |       |
| behavior                                                 | 0.34 |                                                      |       |
| response to biotic stimulus                              | 0.34 |                                                      |       |
| cell wall macromolecule catabolic process                | 5.00 | very-low-density lipoprotein particle clearance      | -6.00 |
| uropod organization                                      | 4.14 | female genitalia development                         | -3.76 |
| bioluminescence                                          | 3.05 | post-embryonic body morphogenesis                    | -3.47 |
| collagen metabolic process                               | 3.02 | acyl-CoA metabolic process                           | -3.20 |
| 'de novo' posttranslational protein folding              | 2.87 | peroxisome organization                              | -3.02 |
| biphenyl metabolic process                               | 2.76 | regulation of autophagy                              | -2.91 |
| NK T cell proliferation                                  | 2.76 | brown fat cell differentiation                       | -2.66 |
| peptidyl-proline modification                            | 2.76 | response to oxygen radical                           | -2.37 |
| peptide cross-linking                                    | 2.73 | electron transport chain                             | -2.34 |
| membrane to membrane docking                             | 2.53 | glycerol ether metabolic process                     | -2.33 |
| toxin metabolic process                                  | 2.47 | hyperosmotic response                                | -2.24 |
| cell recognition                                         | 2.44 | vitamin metabolic process                            | -2.03 |
| antigen processing and presentation                      | 2.37 | proton transport                                     | -1.81 |
| muscle contraction                                       | 2.23 | generation of precursor metabolites and energy       | -1.76 |
| oxygen transport                                         | 2.22 | RNA processing                                       | -1.72 |
| positive regulation of tumor necrosis factor production  | 2.22 | fat cell differentiation                             | -1.72 |
| skin development                                         | 2.03 | base-excision repair                                 | -1.65 |
| xenobiotic metabolic process                             | 2.01 | head development                                     | -1.59 |
| extracellular matrix organization                        | 2.00 | response to starvation                               | -1.43 |
| multicellular organismal metabolic process               | 1.95 | peptide metabolic process                            | -1.33 |
| protein maturation                                       | 1.92 | mitochondrion organization                           | -1.28 |
| protein processing                                       | 1.87 | glucose metabolic process                            | -1.23 |
| gas transport                                            | 1.87 | oxygen and reactive oxygen species metabolic process | -1.22 |
| response to xenobiotic stimulus                          | 1.79 | homophilic cell adhesion                             | -1.22 |
| positive regulation of Wnt receptor signaling pathway    | 1.72 | response to peptide hormone stimulus                 | -1.05 |
| protein polymerization                                   | 1.67 | negative regulation of catalytic activity            | -1.00 |
| blood vessel remodeling                                  | 1.67 | tRNA processing                                      | -0.99 |
| response to inorganic substance                          | 1.65 | cellular aromatic compound metabolic process         | -0.94 |
| translational elongation                                 | 1.59 | heterocycle metabolic process                        | -0.72 |

## Beta-less Control vs. WT Control

|                                                          |      |                          |       |
|----------------------------------------------------------|------|--------------------------|-------|
| integrin-mediated signaling pathway                      | 1.51 | response to drug         | -0.68 |
| neuromuscular synaptic transmission                      | 1.47 |                          |       |
| actin filament-based process                             | 1.44 |                          |       |
| protein stabilization                                    | 1.44 |                          |       |
| blood vessel development                                 | 1.32 |                          |       |
| aging                                                    | 1.29 |                          |       |
| tissue remodeling                                        | 1.13 |                          |       |
| anatomical structure formation involved in morphogenesis | 1.10 |                          |       |
| muscle organ development                                 | 1.08 |                          |       |
| regulation of epithelial cell proliferation              | 1.04 |                          |       |
| palate development                                       | 1.02 |                          |       |
| cell activation                                          | 1.00 |                          |       |
| alcohol catabolic process                                | 0.99 |                          |       |
| positive regulation of cellular component movement       | 0.98 |                          |       |
| digestive tract development                              | 0.95 |                          |       |
| endocytosis                                              | 0.94 |                          |       |
| sulfur compound metabolic process                        | 0.94 |                          |       |
| respiratory system development                           | 0.93 |                          |       |
| ossification                                             | 0.92 |                          |       |
| bone development                                         | 0.91 |                          |       |
| phosphatidylinositol-mediated signaling                  | 0.90 |                          |       |
| ectoderm development                                     | 0.88 |                          |       |
| mRNA transport                                           | 0.84 |                          |       |
| skeletal system development                              | 0.82 |                          |       |
| enzyme linked receptor protein signaling pathway         | 0.82 |                          |       |
| cellular membrane organization                           | 0.81 |                          |       |
| response to other organism                               | 0.79 |                          |       |
| tube development                                         | 0.78 |                          |       |
| regulation of growth                                     | 0.77 |                          |       |
| cellular component movement                              | 0.76 |                          |       |
| carbohydrate metabolic process                           | 0.75 |                          |       |
| locomotory behavior                                      | 0.74 |                          |       |
| regulation of ossification                               | 0.72 |                          |       |
| response to biotic stimulus                              | 0.71 |                          |       |
| glycoprotein metabolic process                           | 0.66 |                          |       |
| protein folding                                          | 0.65 |                          |       |
| positive regulation of apoptotic process                 | 0.62 |                          |       |
| translation                                              | 0.62 |                          |       |
| anterior/posterior pattern specification                 | 0.59 |                          |       |
| behavior                                                 | 0.59 |                          |       |
| regulation of phosphorylation                            | 0.51 |                          |       |
| pattern specification process                            | 0.48 |                          |       |
| microtubule-based process                                | 0.42 |                          |       |
| cell division                                            | 0.42 |                          |       |
| regulation of protein metabolic process                  | 0.40 |                          |       |
| cell cycle process                                       | 0.27 |                          |       |
| cellular ketone body metabolic process                   | 4.22 | musculoskeletal movement | -5.58 |
| mitochondrial respiratory chain complex assembly         | 4.01 | muscle contraction       | -4.94 |

|                                                             |      |                                                          |       |
|-------------------------------------------------------------|------|----------------------------------------------------------|-------|
| oxygen transport                                            | 3.60 | response to activity                                     | -4.46 |
| taurine metabolic process                                   | 3.55 | cardiac muscle tissue development                        | -4.40 |
| peroxisome fission                                          | 2.99 | uropod organization                                      | -4.32 |
| low-density lipoprotein receptor particle metabolic process | 2.99 | fructose 1,6-bisphosphate metabolic process              | -4.24 |
| water transport                                             | 2.92 | cell wall macromolecule catabolic process                | -3.45 |
| response to hyperoxia                                       | 2.86 | bioluminescence                                          | -3.44 |
| glucose 6-phosphate metabolic process                       | 2.81 | response to inorganic substance                          | -3.40 |
| very-low-density lipoprotein particle clearance             | 2.71 | response to metal ion                                    | -3.38 |
| iron-sulfur cluster assembly                                | 2.44 | 'de novo' posttranslational protein folding              | -3.16 |
| acetyl-CoA metabolic process                                | 2.31 | peptidyl-proline modification                            | -2.93 |
| response to sterol depletion                                | 2.30 | pattern specification process                            | -2.67 |
| brown fat cell differentiation                              | 2.25 | cytolysis                                                | -2.67 |
| electron transport chain                                    | 2.15 | spermine metabolic process                               | -2.53 |
| Leydig cell differentiation                                 | 1.96 | positive regulation of endocytosis                       | -2.22 |
| response to arsenic-containing substance                    | 1.83 | cellular metal ion homeostasis                           | -2.15 |
| gas transport                                               | 1.70 | respiratory burst                                        | -1.92 |
| fatty acid metabolic process                                | 1.66 | protein stabilization                                    | -1.76 |
| generation of precursor metabolites and energy              | 1.61 | actin filament-based process                             | -1.66 |
| translational elongation                                    | 1.53 | actin cytoskeleton organization                          | -1.65 |
| proton transport                                            | 1.46 | neuromuscular synaptic transmission                      | -1.65 |
| glycerol-3-phosphate metabolic process                      | 1.45 | collagen metabolic process                               | -1.57 |
| negative regulation of hydrolase activity                   | 1.39 | peptide cross-linking                                    | -1.55 |
| vitamin metabolic process                                   | 1.38 | cell cycle arrest                                        | -1.54 |
| hexose metabolic process                                    | 1.31 | cell-substrate adhesion                                  | -1.52 |
| autophagy                                                   | 1.29 | extracellular matrix organization                        | -1.51 |
| cellular aldehyde metabolic process                         | 1.23 | multicellular organismal metabolic process               | -1.45 |
| mitochondrial transport                                     | 1.19 | integrin-mediated signaling pathway                      | -1.42 |
| glycerol ether metabolic process                            | 1.14 | muscle organ development                                 | -1.40 |
| fat cell differentiation                                    | 1.13 | chemotaxis                                               | -1.32 |
| translation                                                 | 1.11 | cell activation                                          | -1.14 |
| oxygen and reactive oxygen species metabolic process        | 1.10 | cell fate commitment                                     | -1.13 |
| rRNA processing                                             | 1.08 | cell growth                                              | -1.08 |
| receptor metabolic process                                  | 1.07 | osteoblast differentiation                               | -1.07 |
| blood vessel remodeling                                     | 1.06 | response to wounding                                     | -1.05 |
| protein folding                                             | 0.96 | immune response                                          | -1.00 |
| sulfur compound metabolic process                           | 0.96 | ossification                                             | -0.99 |
| cell recognition                                            | 0.94 | bone development                                         | -0.95 |
| cellular aromatic compound metabolic process                | 0.94 | protein maturation                                       | -0.94 |
| response to peptide hormone stimulus                        | 0.83 | regulation of cytokine production                        | -0.93 |
| amine metabolic process                                     | 0.78 | protein processing                                       | -0.92 |
| lipoprotein metabolic process                               | 0.75 | cellular membrane organization                           | -0.90 |
| carbohydrate metabolic process                              | 0.75 | MAPK cascade                                             | -0.89 |
| heterocycle metabolic process                               | 0.62 | locomotory behavior                                      | -0.88 |
| RNA processing                                              | 0.56 | response to other organism                               | -0.85 |
|                                                             |      | skeletal system development                              | -0.80 |
|                                                             |      | anatomical structure formation involved in morphogenesis | -0.80 |
|                                                             |      | cytokine production                                      | -0.78 |
|                                                             |      | DNA replication                                          | -0.75 |

|  |                                                  |       |
|--|--------------------------------------------------|-------|
|  | respiratory system development                   | -0.74 |
|  | aging                                            | -0.74 |
|  | behavior                                         | -0.72 |
|  | regulation of phosphorylation                    | -0.66 |
|  | response to biotic stimulus                      | -0.64 |
|  | cellular component movement                      | -0.64 |
|  | enzyme linked receptor protein signaling pathway | -0.56 |
|  | microtubule-based process                        | -0.54 |
|  | tube development                                 | -0.52 |
|  | response to abiotic stimulus                     | -0.37 |
