# Supplementary figures and images for: Stress-induced activation of brown adipose tissue prevents obesity in conditions of low adaptive thermogenesis
Source: PubMed Central journal article supplement — Mol Metab. 2015 Nov 11;5(1):19–33. doi: 10.1016/j.molmet.2015.10.005 (PMC4703853; doi:10.1016/j.molmet.2015.10.005), 2015-11-11

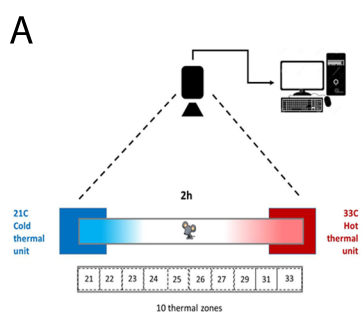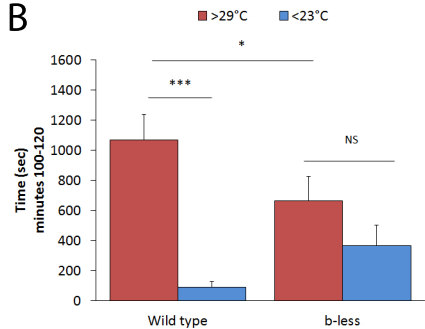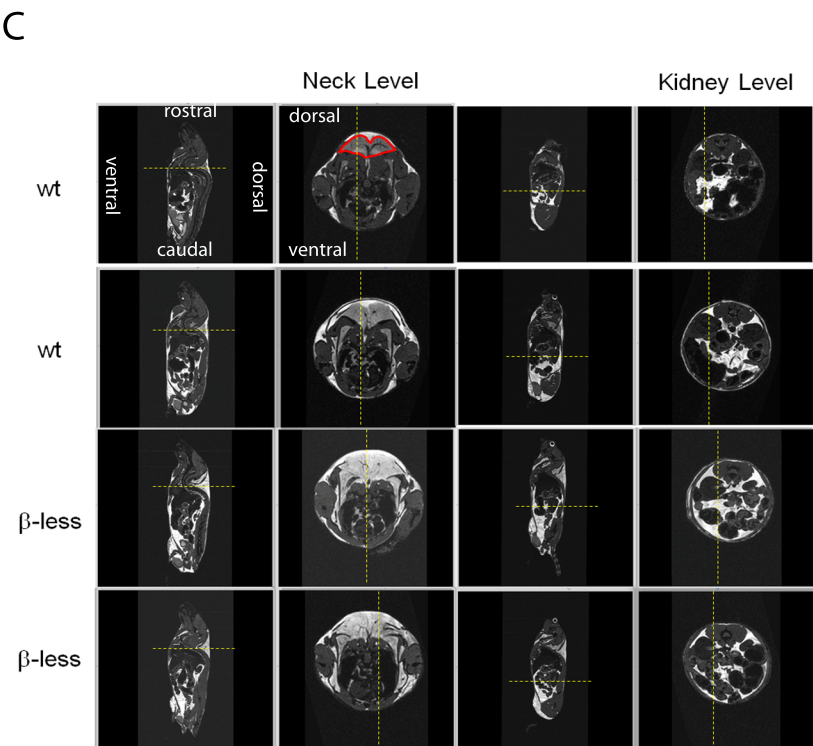

Supplement: mmc1.pdf [file mmc1.pdf]

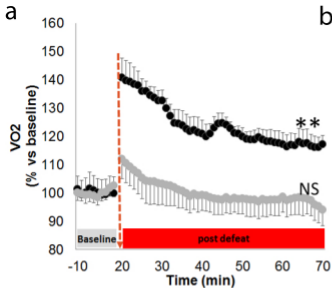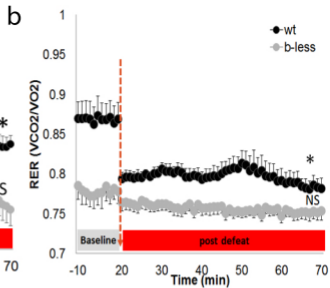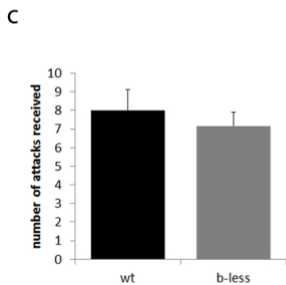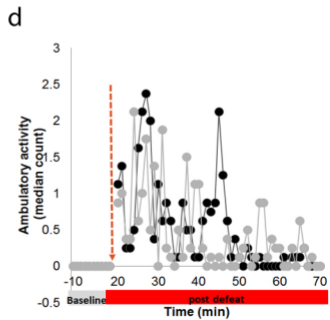

Supplement: mmc2.pdf [file mmc2.pdf]

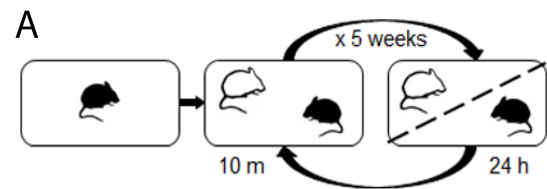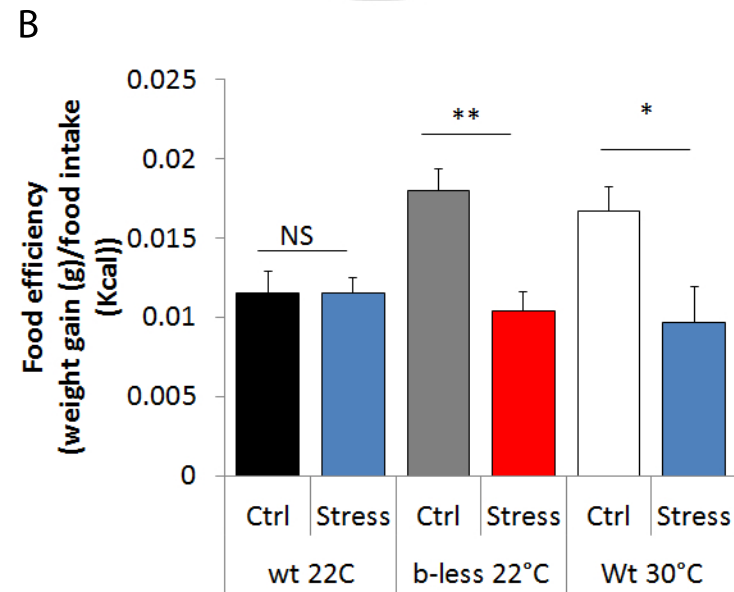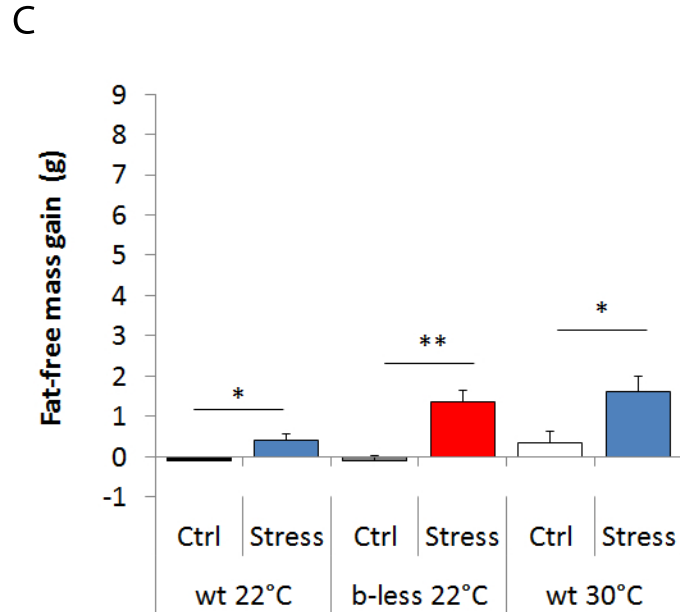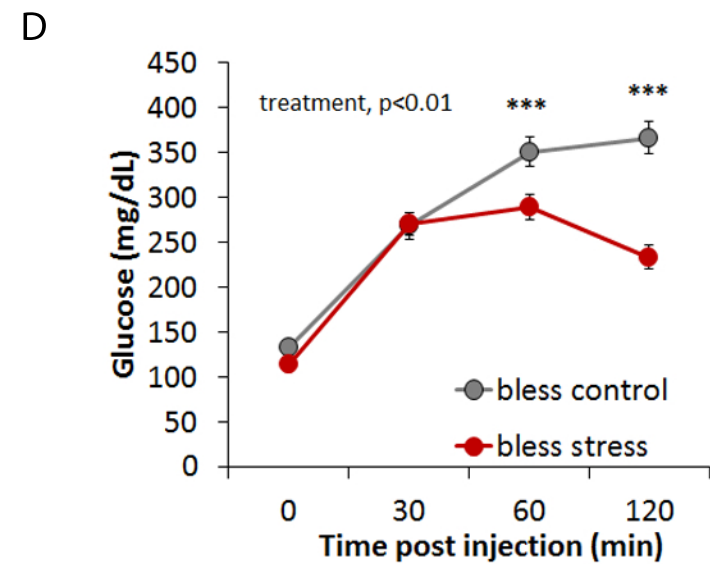

Supplement: mmc3.pdf [file mmc3.pdf]

A

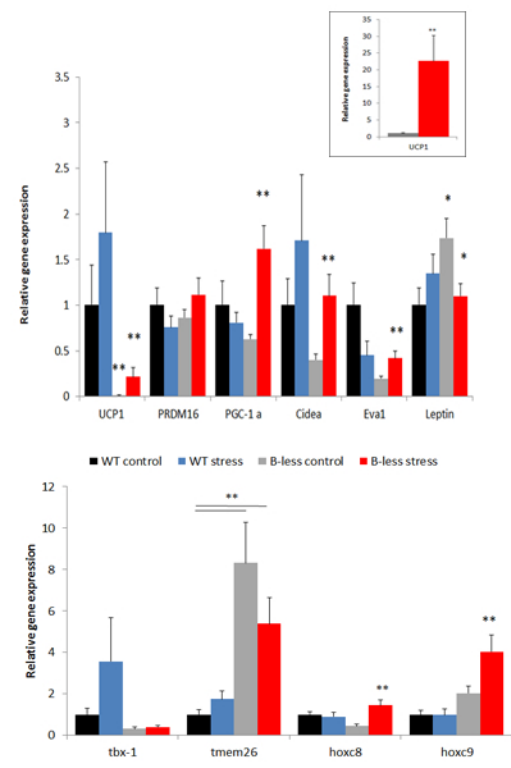

B

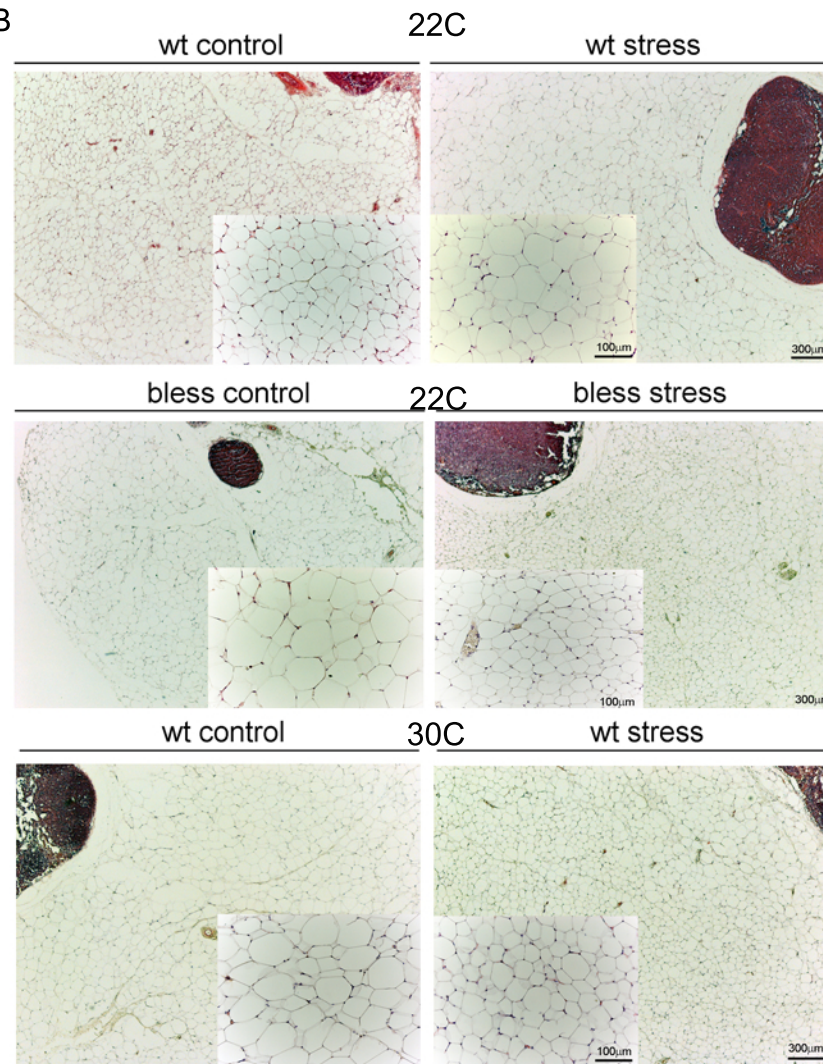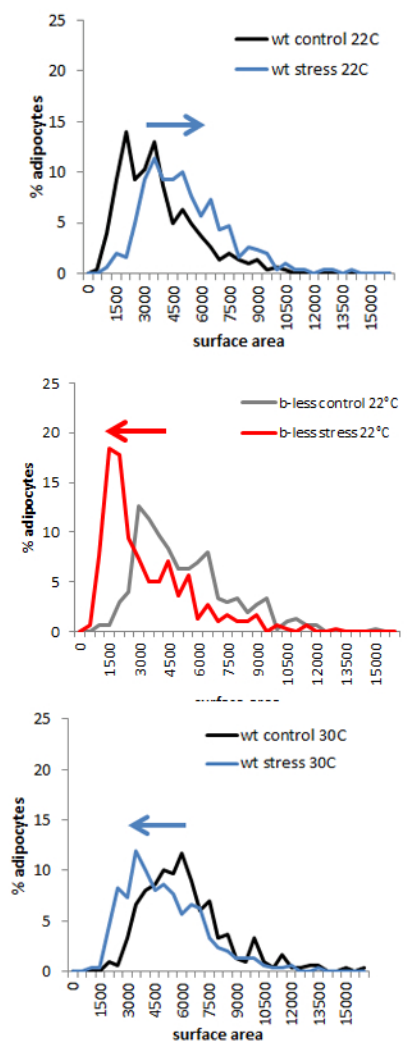

C

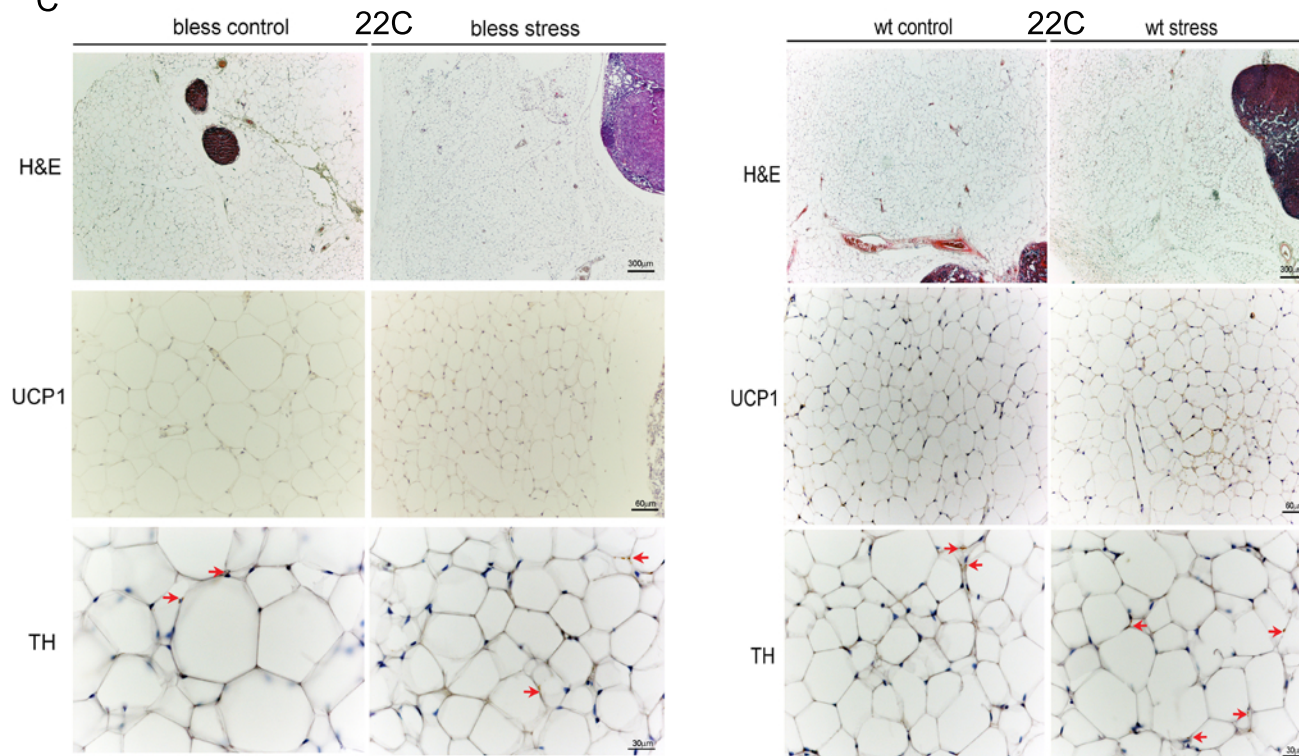

Supplement: mmc4.pdf [file mmc4.pdf]

A

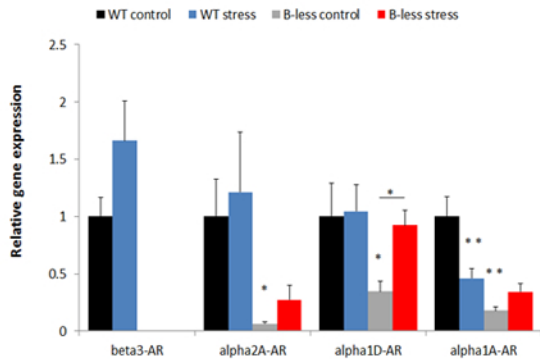

B

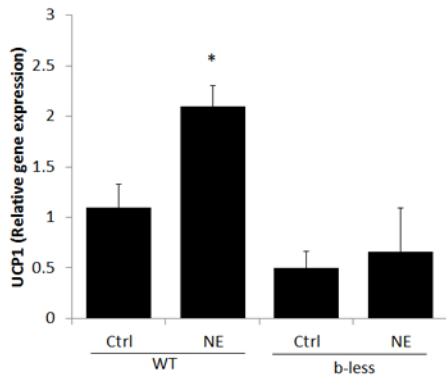

C

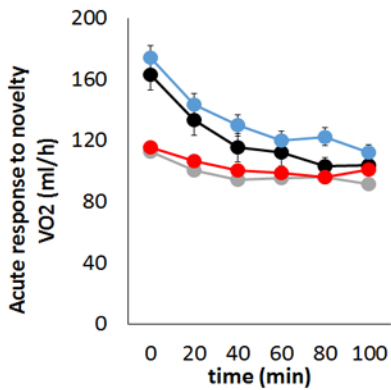

Supplement: mmc5.pdf [file mmc5.pdf]

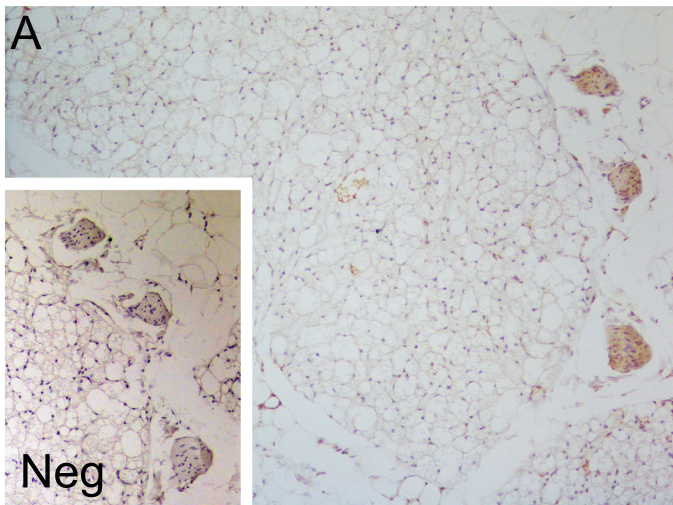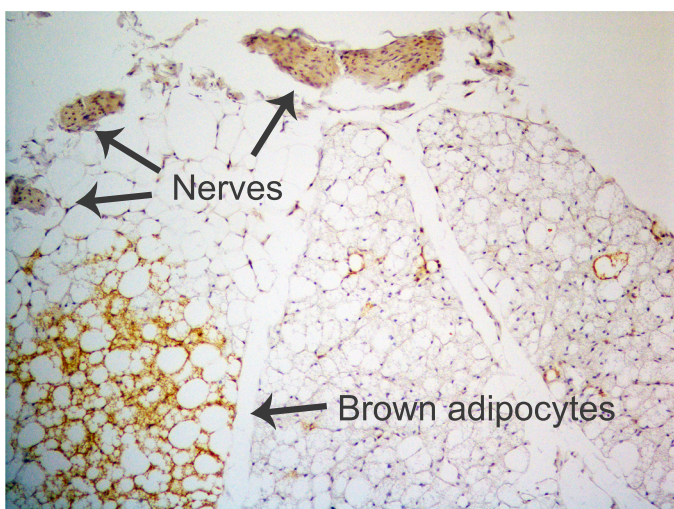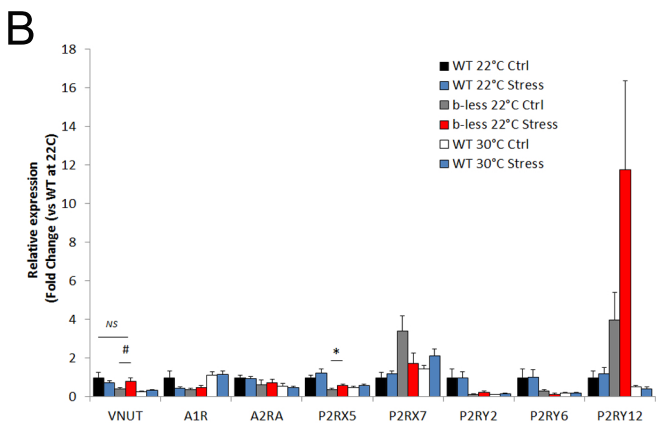

Supplement: mmc6.pdf [file mmc6.pdf]

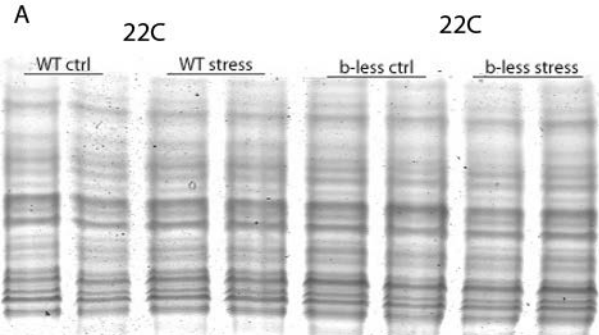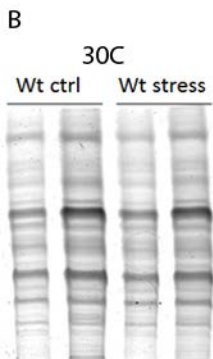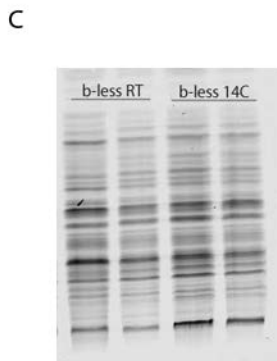

Supplement: mmc7.pdf [file mmc7.pdf]
